# Supplementary material for: Microevolution of extensively drug-resistant tuberculosis in Russia
Source: HighWire-hosted journal article supplement (doi:10.1101/gr.128678.111), 2012-01-31
Supplement: suppl_fig.pdf [file suppl_fig.pdf]

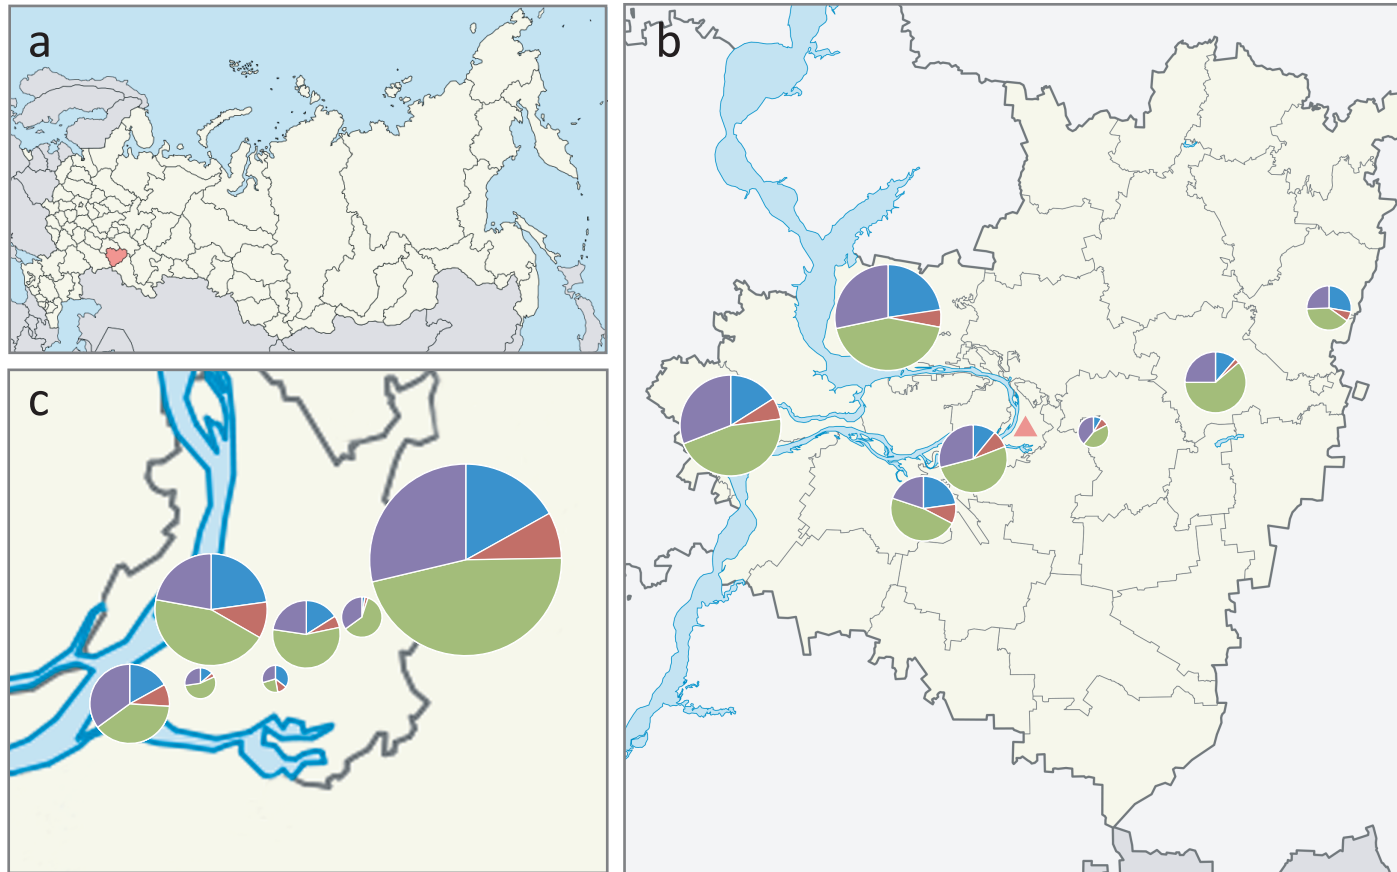

**Supplementary Figure. Distribution of the major *M. tuberculosis* lineages and clades across Samara.**

Maps show the location of Samara Oblast within the Russian Federation (a), Samara Oblast; the location of Samara City is marked with a triangle (b), and Samara City (c). The charts show the location of the clinics recruiting patients and the proportion of isolates from each belonging to clade A (blue), clade B (red), other Beijing types (green), and other lineages (purple). The area of pie charts is proportional to the number of cases.
